# Supplementary material for: Energy-Efficient Computation Offloading and Transmit Power Allocation Scheme for Mobile Edge Computing
Source: Hindawi journal article supplement (doi:10.1155/2019/3613250), 2019-12-16
Supplement: f1 [file 3613250.f1.zip]

Archive with 11 entries (10 files):
- Simulation_Results/
- Simulation_Results/deadline.txt
- Simulation_Results/e_results.txt
- Simulation_Results/plot_deadline.m
- Simulation_Results/plot_energy.m
- Simulation_Results/plot_r_delay.m
- Simulation_Results/plot_r_energy.m
- Simulation_Results/plot_time.m
- Simulation_Results/r_delay.txt
- Simulation_Results/r_energy.txt
- Simulation_Results/t_results.txt
