# Supplementary material for: Energy-Efficient Computation Offloading and Transmit Power Allocation Scheme for Mobile Edge Computing
Source: Hindawi journal article supplement (doi:10.1155/2019/3613250), 2019-12-16
Supplement: f1 [file 3613250.f1.zip › Simulation_Results/deadline.txt]

6000.8422 5027.4367 4120.9348 3094.4589 2215.8974 1874.0932 1874.0932 1874.0932 1874.0932 1874.0932 1874.0932
6000.8422 5538.2384 5002.8391 4593.9348 4019.3901 3692.2048 3692.2048 3692.2048 3692.2048 3692.2048 3692.2048
7924.5892 7924.5892 7924.5892 7924.5892 7924.5892 7924.5892 7924.5892 7924.5892 7924.5892 7924.5892 7924.5892
