# Supplementary material for: Energy-Efficient Computation Offloading and Transmit Power Allocation Scheme for Mobile Edge Computing
Source: Hindawi journal article supplement (doi:10.1155/2019/3613250), 2019-12-16
Supplement: f1 [file 3613250.f1.zip › Simulation_Results/e_results.txt]

120.4680 192.2901 284.7962 400.4316 492.3847 647.4234 772.4912 925.3367 1183.1228 
105.4680 180.2901 274.7962 425.4316 533.3847 713.4234 850.4912 1033.3367 1306.1228
129.4120 255.5643 368.8935 495.8397 624.8923 798.8732 990.9832 1233.6735 1554.8564
117.6741 246.9764 450.3565 600.8675 801.2376 970.4563 1190.6455 1450.4634 1799.3530
