# Supplementary material for: Energy-Efficient Computation Offloading and Transmit Power Allocation Scheme for Mobile Edge Computing
Source: Hindawi journal article supplement (doi:10.1155/2019/3613250), 2019-12-16
Supplement: f1 [file 3613250.f1.zip › Simulation_Results/r_delay.txt]

0.1224 0.2115 0.3314 0.4598 0.6216 0.8182 1.0435 1.2736 1.5424
0.0724 0.1415 0.2084 0.2998 0.4116 0.5682 0.7385 0.9436 1.1524
0.04024 0.0815 0.1354 0.1898 0.2900 0.4082 0.5585 0.7236 0.9324
