# Supplementary material for: Energy-Efficient Computation Offloading and Transmit Power Allocation Scheme for Mobile Edge Computing
Source: Hindawi journal article supplement (doi:10.1155/2019/3613250), 2019-12-16
Supplement: f1 [file 3613250.f1.zip › Simulation_Results/r_energy.txt]

90.4680 132.2901 179.7962 255.4316 332.3847 467.4234 592.4912 765.3367 993.1228 
120.4680 182.2901 254.7962 351.4316 472.3847 637.4234 812.4912 1041.3367 1303.1228 
165.4680 272.2901 394.7962 560.4316 722.3847 923.4234 1132.4912 1405.3367 1713.1228 
