# Supplementary material for: Energy-Efficient Computation Offloading and Transmit Power Allocation Scheme for Mobile Edge Computing
Source: Hindawi journal article supplement (doi:10.1155/2019/3613250), 2019-12-16
Supplement: f1 [file 3613250.f1.zip › Simulation_Results/t_results.txt]

0.1104 0.1495 0.2214 0.2998 0.4116 0.5682 0.7385 0.9436 1.1524 
0.1204 0.1695 0.2514 0.3398 0.4646 0.6182 0.7985 1.0236 1.2324
0.1256 0.1993 0.2718 0.3945 0.5286 0.7139 0.9085 1.1236 1.3324 
0.1052 0.2145 0.3293 0.5076 0.6827 0.8983 1.1028 1.3167 1.5584 
